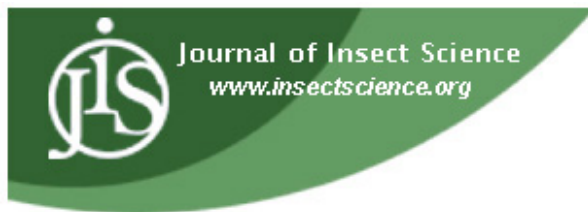

## Checklist of Iranian Encyrtids (Hymenoptera: Chalcidoidea) with descriptions of new species

Majid Fallahzadeh<sup>1a</sup> and George Japoshvili<sup>2,3b</sup>

<sup>1</sup>Department of Entomology, Islamic Azad University, Jahrom Branch, Fars, Iran

<sup>2</sup>Department of Plant Protection, Faculty of Agriculture, Suleyman Demirel University, Isparta, Turkey

<sup>3</sup>Entomology and Biocontrol Research Centre, Ilia State University, Tbilisi, Georgia

### Abstract

A list of Iranian Encyrtidae (Hymenoptera: Chalcidoidea) is given for the first time. It includes 93 species representing 32 genera. Host information from Iran and distributional data are also provided. Three genera and 7 species are first recorded from Iran. New host records are provided for three species. Two new species, *Gyranusoidea iranica* sp. n. and *Microterys iranicus* sp. n., are described and diagnostic characters are provided for them.

**Key words:** New species, Hymenoptera, Encyrtidae, Distribution, Iran

**Abbreviations:** **AOL**, distance between posterior and anterior ocelli; **EL**, maximum eye length; **FV**, minimum frontovertex width; **F<sub>1</sub>**, **F<sub>2</sub>**, etc., first funicle segment, second funicle segment, etc.; **GL**, maximum length of gonostylus (= third valvula); **HW**, maximum head width; **MS**, malar space (shortest distance from eye to mouth margin); **OCL**, occipital ocellar line (distance of posterior ocellus from occipital margin); **OD**, greatest diameter of an ocellus; **OL**, ovipositor length; **OOL**, ocular-ocellar line (shortest distance between posterior ocellus and adjacent eye margin); **OPL**, length of outer plate of ovipositor; **OPW**, maximum width of outer plate of ovipositor; **POL**, posterior ocellar line (= the shortest distance between the posterior ocelli); **SL**, scape length; **SW**, scape width; **Acronym for depository**, **EBRC**, Insect collection of Entomology and Biocontrol Research Centre, Ilia State University, Tbilisi, Georgia

**Correspondence:** <sup>a</sup> mfallahm@yahoo.com, <sup>b</sup> giorgij70@yahoo.com

**Associate Editor:** Eugene Hall was editor of this paper

**Received:** 22 January 2009, **Accepted:** 1 September 2009

**Copyright :** This is an open access paper. We use the Creative Commons Attribution 3.0 license that permits unrestricted use, provided that the paper is properly attributed.

**ISSN:** 1536-2442 | Vol. 10, Number 68

#### Cite this paper as:

Fallahzadeh M, Japoshvili G. 2010. Checklist of Iranian Encyrtids (Hymenoptera: Chalcidoidea) with descriptions of new species. *Journal of Insect Science* 10:68 available online: [insectscience.org/10.68](http://insectscience.org/10.68)

## Introduction

The Encyrtidae is the most speciose group of parasitoids attacking scale and psyllid insects. Members of the family are important in biological control. More than 400 encyrtid species have been used or are used today for suppression of various crop pests (Japoshvili and Noyes 2006). There are more than 1270 described species of encyrtids in the Palaearctic Region (Trjapitzin 1989; Yasnosh and Japoshvili 1999; Japoshvili 2005, 2007a, b; Japoshvili and Karaca 2003; Japoshvili and Abrantes 2006; Japoshvili and Noyes 2005, 2006).

The encyrtid fauna in Iran has been a subject of special investigations only in the last few years. The first published records of Iranian Encyrtidae were those by Kiriukhin (1947), who reported some Encyrtid parasitoids of scale insects. Several species were subsequently recorded by Farahbakhsh (1961), Chodjai (1968), Davatchi and Chodjai (1969), OILB (1971), Herting (1971, 1972), Chodjai (1976, 1989) and Radjabi (1986). Papers by Asadeh and Mossadegh (1991, 1993), Ebrahimi (1993), and Yazdani and Mehrnejad (1993) contain some faunistical data on Iranian Encyrtidae. Modares Awal (1997) cited 31 species of encyrtids in his list of agricultural pests and their natural enemies in Iran. Ferrière (1961), Myartseva and Sugonjaev (1977), Myartseva (1980), Xu and Lotfalizadeh (2000), Noyes and Fallahzadeh (2005) and Manickavasagam, Mehrnejad (2008) described new species from Iran. Noyes (2009) in his database lists 42 species from Iran. In recent years some faunistical studies have been conducted on Iranian Encyrtidae and currently the number of species of this family recorded in Iran has increased to about 84 (Lotfalizadeh and

Ebrahimi 2001; Davoodi et al. 2004 a, b, c, d; Fallahzadeh and Hesami 2004; Japoshvili and Noyes 2005; Fallahzadeh et al. 2006a, b, 2007 2008; Talebi et al. 2008). This is a modest result, given that the area of Iran is almost twice that of Turkey and Transcaucasus combined, where 307 species were recorded (Japoshvili, Noyes 2005).

Although many studies have been conducted on the Encyrtidae of Iran, their results were scattered in different publications and have never been summarized. The present list was compiled to provide a reference for future studies on this family in Iran. It includes insect hosts and associated host plants from Iran.

Ninety three species of Encyrtidae belonging to 32 genera are currently known from Iran. All references about Iranian Encyrtids are summarized and synonyms recorded from Iran are provided, as well as host information and distributional data. Three genera and seven species are first recorded from Iran. Additionally, new hosts are provided for three species. Two new species, *Gyranusoidea iranica* Japoshvili and Fallahzadeh sp. nov. and *Microterys iranicus* Japoshvili and Fallahzadeh sp. nov. are described.

## Material and Methods

Material was collected from 2005 to 2007 in different parts of Iran, and voucher specimens for new records and new species are deposited in the Insect collection of Entomology and Biocontrol Research centre, Ilia State University, Tbilisi, Georgia. All available literature sources were summarized for the first time as well. Taxonomic concepts mostly follow Trjapitzin (1989), Gibson et al. (1997) and Noyes (2009). Synonyms, worldwide

distributions, and host information, from outside Iran are not included as most of these data are provided in the Universal Chalcidoidea Database (Noyes 2009). All measurements were done using Hirox digital microscope KH-7700. Description and terminology follows Noyes (2009).

## Results and Discussion

The list of Iranian Encyrtidae now contains 93 species belonging to 32 genera. Three genera not previously recorded from Iran are: *Anicetus* Howard, 1896, *Gyranusoidea* Compere, 1947 and *Paranathrix* Myartseva, 1980. Seven species that are marked with an asterisk are newly recorded for the country. Additionally three species that are marked with double asterisks have new host records. Two new species: *Gyranusoidea iranica* and *Microterys iranicus* are described. The complete list of Encyrtid wasps of Iran follows. Iran is a large country incorporating various geographical regions and climates and we expect that many species remain to be discovered. More studies should be conducted on this important insect group in Iran.

### Genus *Ageniaspis* Dahlbom, 1857

#### *Ageniaspis fuscicollis* (Dalman, 1820)

Synonym in Iranian literature: *Encyrtus fuscicollis* Dalman, 1820 (Radjabin 1986; Safaralizadeh 1984; Moddarres Awal 1997).

Host: *Hyponomeuta malinellus* [Yponomeuta malinellus Zeller] (Lepidoptera: Yponomeutidae), *H. padellus* [*Y. padella* (L.)] on fruit tree (Rosaceae), *H. rorellus* [*Y. rorella* (Hübner)] on *Salix* (Salicaceae) (Esmaili 1983; Safaralizadeh 1984; Radjabin 1986; Moddarres Awal 1997), *Y. malinellus* on *Malus* sp. (Rosaceae) (Haeselbarth 1983). Iranian records: Azerbaijan, Hamadan, Kurdistan, Markazi, Zanjan, Tehran, Qazvin provinces (Esmaili 1983; Safaralizadeh 1984;

Radjabin 1986; Moddarres Awal 1997), Iran (Trjapitzin 1978; Haeselbarth 1983; Trjapitzin 1989).

#### *Ageniaspis testaceipes* (Ratzeburg, 1848)

Synonym in Iranian literature: *Ageniaspis (Holcothorax) testaceipes* (Ratzeburg 1848) (Chodjai 1968; Davatchi and Chodjai 1969; Chodjai 1989; Behdad 1991; Moddarres Awal 1997).

Host: *Lithocolletis platani* [*Phyllonorycter platani* (Staudinger)] (Lepidoptera: Gracillariidae) on *Platanus orientalis* L. (Platanaceae) (Chodjai 1968; Chodjai 1989; Davatchi and Chodjai 1969; Trjapitzin 1989). Iranian records: Tehran province (Chodjai 1968; Davatchi and Chodjai 1969; Chodjai 1989; Behdad 1991; Moddarres Awal 1997), Iran (Trjapitzin 1989).

### Genus *Anagyrus* Howard, 1896

#### *Anagyrus agraensis* Saraswat, 1975

Synonym in Iranian literature: *Anagyrus indicus* Shafee, Alam and Agarwal, 1975 (Awal, 1997).

Hosts: *Nipaecoccus viridis* (Newstead) (Hemiptera: Pseudococcidae) on *Citrus* (Rutaceae) and *Morus alba* L. (Moraceae) (Asadeh and Mossadegh 1991, 1993; Noyes and Hayat 1994; Baniameri and Mossadegh 1998a, 1998b; Novin et al. 2000; Hesami and Fallahzadeh 2005), *Maconellicoccus hirsutus* (Green) (Hemiptera: Pseudococcidae) on *M. alba* L. (Moraceae) (Fallahzadeh and Hesami 2004; Fallahzadeh et al. 2007).

Iranian records: Khuzestan province (Asadeh and Mossadegh 1991, 1993; Noyes and Hayat 1994; Moddarres Awal 1997; Baniameri and Mossadegh 1998a, 1998b; Novin et al. 2000), Tehran province (Noyes and Hayat 1994), Fars province (Fallahzadeh and Hesami 2004; Hesami and Fallahzadeh 2005; Fallahzadeh et al. 2007).

***Anagyrus aligarhensis* Agarwal and Alam, 1959**

Synonym in Iranian literature: *Anagyrus diversicornis* Mercet, 1921 (Asadeh and Mosadegh 1991; 1993; Noyes and Hayat 1994; Novin et al. 2000; Hesami and Fallahzadeh 2004, 2005).

Host: *N. viridis* (Newstead) (Hemiptera: Pseudococcidae) on *Citrus* (Rutaceae) and *M. alba* L. (Moraceae) (Asadeh and Mossadegh 1991, 1993; Noyes and Hayat 1994; Novin et al. 2000; Hesami and Fallahzadeh 2004, 2005).

Iranian records: Khuzestan province (Asadeh and Mosadegh 1991, 1993; Novin et al. 2000), Tehran province (Noyes and Hayat 1994), Fars province (Hesami and Fallahzadeh 2004; 2005).

***Anagyrus dactylopii* (Howard, 1898)**

Hosts: *N. viridis* (Newstead) (Hemiptera: Pseudococcidae) on *Citrus* (Rutaceae) and *Morus alba* L. (Moraceae) (Asadeh and Mossadegh 1991, 1993; Noyes and Hayat 1994; Baniameri and Mossadegh 1998a; 1998b; Novin et al. 2000; Dezhakam and Soleyman Nejadian 2000; Hesami and Fallahzadeh 2005), *Planococcus citri* (Rissio) on *Citrus* (Maafi et al. 1998); *M. hirsutus* (Green) (Hemiptera: Pseudococcidae) on *M. alba* L. (Moraceae) (Fallahzadeh and Hesami 2004; Fallahzadeh et al. 2007).

Iranian records: Khuzestan province (Asadeh and Mossadegh 1991, 1993; Noyes and Hayat 1994; Mossadegh and Baniameri 1996; Baniameri and Mossadegh 1998a; Novin et al. 2000; Dezhakam and Soleyman Nejadian 2000), Tehran province (Noyes and Hayat 1994), Mazandaran province (Maafi et al. 1998), Fars province (Fallahzadeh and Hesami 2004; Hesami and Fallahzadeh 2005; Fallahzadeh et al. 2007).

***Anagyrus kamali* Moursi, 1948**

Host: *M. hirsutus* (Green) (Hemiptera: Pseudococcidae) on *M. alba* L. (Moraceae) (Fallahzadeh et al. 2007).

Iranian record: Fars province (Fallahzadeh et al. 2007).

***Anagyrus matritensis* (Mercet, 1921)**

Synonym in Iranian literature: *Anagyrus orbitalis* (Ruschka 1923) (Fallahzadeh et al. 2006b).

Host: *Peliococcus kimmericus* (Kiritshenko) (Hemiptera: Pseudococcidae) on *Lactuca serriola* L. (Asteraceae) (Fallahzadeh et al. 2006b).

Iranian record: Fars province (Fallahzadeh et al. 2006b).

***Anagyrus mirzai* Agarwal and Alam, 1959**

Host: *N. viridis* (Newstead) (Hemiptera: Pseudococcidae) on *Citrus* (Rutaceae) (Novin 2000, Hesami and Fallahzadeh 2005), *M. hirsutus* (Green) (Hemiptera: Pseudococcidae) on *M. alba* L. (Moraceae) (Fallahzadeh and Hesami 2004; Fallahzadeh et al. 2007).

Iranian records: Khuzestan province (Novin 2000), Fars province (Fallahzadeh and Hesami 2004; Hesami and Fallahzadeh 2005; Fallahzadeh et al. 2007).

***Anagyrus pseudococci* (Girault, 1915)**

Hosts: *P. citri* (Risso) (Hemiptera: Pseudococcidae) on *Ficus carica* L. (Moraceae) (Chodjai 1968, 1976, 1989), *P. citi* (Hemiptera: Pseudococcidae) and *Marietta picta* (Andre) on *Vitis vinifera* L. (Vitaceae) (Hymenoptera, Aphelinidae) (OILB, 1971), *Pseudococcus filamentosus* [*Nipaecoccus viridis* (Newstead)] (Hemiptera, Pseudococcidae) on *Citrus* (Khalaf and Aberoumand 1986), *Planococcus vovae* (Nasonov) on cypress tree (Cupressaceae) (Hemiptera, Pseudococcidae) (Xu and Lotfalizadeh 2000; Lotfalizadeh and Ahmadi 2000; Talebi et al. 2008); *N. viridis* on *Citrus*

(Rutaceae) (Hesami and Fallahzadeh 2004, 2005) *M. hirsutus* (Green) (Hemiptera: Pseudococcidae) on *M. alba* L. (Moraceae) (Fallahzadeh and Hesami 2004; Fallahzadeh et al. 2007).

Iranian records: Tehran province (Chodjai 1968, 1976, 1989; Moddarres Awal 1994; Talebi et al. 2008) Fars province (Khalaf and Aberoumand 1986; Moddarres Awal 1997; Xu and Lotfalizadeh 2000; Lotfalizadeh and Ahmadi 2000; Fallahzadeh and Hesami 2004; Hesami and Fallahzadeh 2004; Hesami and Fallahzadeh 2005; Fallahzadeh et al. 2007); Iran (OILB 1971).

#### ***Anagyrus schoenherri* (Westwood, 1837)**

Hosts: *Eulecanium coryli* [*Eulecanium tiliae* (Linnaeus)] and *Pulvinaria betulae* [*Pulvinaria vitis* (Linnaeus)] (Hemiptera: Coccidae) on rosaceous fruit trees (Rosaceae) (Radjabi 1989); *P. vitis* (Herting 1972), *Phenacoccus aceris* (Signoret) (Hemiptera: Pseudococcidae) (Kiriukhin 1947; Herting 1972; Trjapitzin 1978, 1989).

Iranian records: Iran (Kiriukhin 1947; Herting 1972; Trjapitzin 1978, 1989; Noyes and Hayat 1994), Caspian Sea area, Markazi, Tehran provinces (Farahbakhsh 1961, Radjabi 1989; Moddarres Awal 1997).

#### **Genus *Anicetus* Howard, 1896**

##### **\**Anicetus italicus* (Masi, 1917)**

Material examined: 4♀, 2♂, Estahban, Fars province, ex *Ceroplastes rusci* L. (Hemiptera: Coccidae) on *Ficus carica* L. (Moraceae), 28.IX.2007, M. Fallahzadeh. Voucher specimens housed in EBRC.

#### **Genus *Blastothrix* Mayr, 1876**

##### ***Blastothrix brittanica* Girault, 1917**

Hosts: *Diaspidiotus prunorum* (Laing) (Hemiptera: Diaspididae) and *E. coryli* [*Eulecanium tiliae* (Linnaeus)] (Hemiptera: Coccidae) on rosaceous fruit trees (Rosaceae)

(Dastghyb Beheshti et al. 1988; Radjabi 1989; Behdad 1991; Moddarres Awal 1997).

Iranian records: Isfahan province (Dastghyb Beheshti et al. 1988; Radjabi 1989; Behdad 1991; Moddarres Awal 1997).

##### ***Blastothrix sericea* (Dalman, 1820)**

Hosts: *Sphaerolecanium prunastri* (Boyer de Fonscolombe), *Eulecanium coryli* [*E. tiliae* (Linnaeus)], *E. tiliae* (Hemiptera: Coccidae) on rosaceous fruit trees (Rosaceae) (Behdad and Barouti 1978; Farahbakhsh 1961; Radjabi 1989; Moddarres Awal 1997); *Anapulvinaria pistaciae* (Bodenheimer) (Hemiptera: Coccidae) on *Pistacia vera* L. (Anacardiaceae) (Yazdani and Rajabi 1993), *E. tiliae* on quince tree, apple tree (Rosaceae); *E. coryli* [*E. tiliae*] on cherry tree, apple tree, plum tree, apricot tree (Rosaceae) *S. prunastri* on plum tree (Rosaceae) (Davoodi et al. 2004d).

Iranian records: Isfahan, Tehran and Markazi provinces (Behdad and Barouti 1978; Farahbakhsh 1961; Radjabi 1989; Moddarres Awal 1997) Kerman province (Yazdani and Rajabi 1993) Tehran and Gilan provinces (Davoodi et al. 2004d).

##### ***Blastothrix ilicicola* Mercet, 1921**

Host: *E. coryli* [*E. tiliae* (Linnaeus)] (Hemiptera: Coccidae) on quince tree (Rosaceae) (Ebrahimi 1993).

Iranian record: Chaharmahal-Bakhtiyari province (Ebrahimi 1993).

##### ***Blastothrix hungarica* Erdős, 1959**

Host: *Eulecanium* sp. (Hemiptera: Coccidae) on *Ficus carica* L. (Moraceae) (Hesami et al. 2008)

Iranian record: Fars province (Hesami et al. 2008).

##### ***Blastothrix turanica* Sugonjaev, 1964**

Host: Unknown from Iran.

Iranian record: Iran (Trjapitzin 1989).

**Genus *Cerapterocerus* Westwood, 1833**

***Cerapterocerus mirabilis* Westwood, 1833**

Hosts: *Aonidiella orientalis* (Newstead) (Hemiptera: Diaspididae) on *Citrus* (Rutaceae) (Chodjai 1963; Chodjai 1989; Davatchi and Chodjai 1969; Behdad 1991; Moddarres Awal 1997), Hyperparasitoid of *S. prunastri* (Boyer de Fonscolombe) (Hemiptera: Coccidae) (Davoodi et al. 2004d). Iranian records: Kerman province (Chodjai 1963; Davatchi and Chodjai 1969; Chodjai 1989; Behdad 1991; Moddarres Awal 1997), Tehran province (Davoodi et al. 2004d).

**Genus *Cheiloneurus* Westwood, 1833**

***Cheiloneurus ceroplastis* Ishii, 1923**

Hosts: *Chrysoperla carnea* Stephens and *Suaris fedtchenkoi* (McLachlan) (Neuroptera: Chrysopidae) on cypress tree (Cupressaceae) (Xu and Lotfalizadeh 2000; Lotfalizadeh and Ahmadi 2000; Lotfalizadeh 2000a).

Iranian records: Fars province (Xu and Lotfalizadeh 2000; Lotfalizadeh and Ahmadi 2000; Lotfalizadeh 2000a).

***Cheiloneurus claviger* Thomson, 1876**

Host: *S. prunastri* (Boyer de Fonscolombe) (Hemiptera: Coccidae) on prunaceous trees (Talebi et al. 2009).

Iranian records: Khorasan-e-Razavi province (Talebi et al. 2009).

Material examined: 1♀, Mian-Jangle, Fasa, Fars province, 22°12'N, 53°23'E, 1680m, ex *S. prunastri* (Boyer de Fonscolombe) (Hemiptera: Coccidae) on *Prunus scoparia* (Spach) (Rosaceae), 5.VI.2007, M. Fallahzadeh. Voucher specimens housed in EBRC.

***Cheiloneurus kollari* (Mayer, 1876)**

Host: *P. kimmericus* (Kiritshenko) (Hemiptera: Pseudococcidae) on *Lactuca serriola* L. (Asteraceae) (Fallahzadeh et al. 2006b).

Iranian records: Fars province (Fallahzadeh et al. 2006b).

***Cheiloneurus paralia* (Walker, 1837)**

Host: *P. kimmericus* (Kiritshenko) (Hemiptera: Pseudococcidae) on *L. serriola* L. (Asteraceae) (Fallahzadeh et al. 2006b).

Iranian records: Fars province (Fallahzadeh et al. 2006b).

***Cheiloneurus pistaciae* Manickavasagam and Mehrnejad, 2008**

Hosts: A facultative hyperparasitoid of pistachio twig borer moth, *Kermania pistaciella* (Lepidoptera: Tineidae), via *Chelonus kermakiae* (Hymenoptera: Braconidae) on *P. vera* L. (Anacardiaceae) (Manickavasagam et al. 2008).

Iranian records: Kerman province (Manickavasagam et al. 2008).

**Genus *Choreia* Westwood, 1833**

***Choreia maculata* (Hoffer, 1954)**

Host: Unknown from Iran.

Iranian records: Iran (Trjapitzin 1978, 1989).

**Genus *Coccidoxenoides* Girault, 1915**

***Coccidoxenoides perminutus* Girault, 1915**

Host: *P. vovae* (Nasonov) (Hemiptera: Pseudococcidae) on cypress tree (Cupressaceae) (Talebi et al. 2008).

Iranian record: Tehran province (Talebi et al. 2008).

**Genus *Comperiella* Howard, 1906**

***Comperiella bifasciata* Howard, 1906**

Host: *A. orientalis* (Newstead) (Hemiptera: Diaspididae) on *Citrus* (Rutaceae) (Esmaili 1983; Moddarres Awal 1997).

Iranian records: Hormozgan province (Esmaili 1983; Moddarres Awal 1997).

***Comperiella lemniscata* Compere and Annecke, 1961**

Host: *A. orientalis* (Newstead) (Hemiptera: Diaspididae) on *Citrus* (Rutaceae) (Lachinani and Ahmadi 1993; Prinsloo 1996).

Iranian records: Fars province (Lachinani and Ahmadi 1993); Iran (Prinsloo 1996).

**Genus *Copidosoma* Ratzeburg, 1844**

***Copidosoma pistacinellae* Hoffer, 1970**

Host: *Recurvaria pistacinella* Danilevsky (Lepidoptera: Gelechiidae) on *P. vera* L. (Anacardiaceae) (Hoffer 1970; Trjapitzin 1989).

Iranian records: Iran (Hoffer 1970; Trjapitzin 1989).

***Copidosoma varicorne* (Nees, 1834)**

Synonyms in Iranian literature: *Encyrtus varicornis* Nees, 1834, *Paralitomastix varicornis* (Nees 1834) (Chodjai 1968; Chodjai 1989; Sabzevari 1968; Esmaili 1983; Radjabi 1986; Behdad 1991; Moddarres Awal 1997).

Host: *Anarsia lineatella* (Zeller) (Lepidoptera: Gelechiidae) on Roseous fruit trees (Rosaceae) (Chodjai 1968; Chodjai 1989; Sabzevari 1968; Esmaili 1983; Radjabi 1986; Behdad 1991; Moddarres Awal 1997; OILB 1971).

Iranian records: Azerbaijan, Markazi, Tehran provinces (Chodjai 1968; Chodjai 1989; Sabzevari 1968; Esmaili 1983; Radjabi 1986; Behdad 1991; Moddarres Awal 1997), Iran (OILB 1971; Trjapitzin 1989; Guerrieri and Noyes 2005).

**Genus *Discodes* Förster, 1856**

***Discodes coccophagus* (Ratzeburg, 1848)**

Host: *S. prunastri* (Boyer de Fonscolombe) (Hemiptera: Coccidae) on prunaceous trees (Talebi et al. 2009).

Iranian records: Khorasan-e-Razavi province (Talebi et al. 2009).

Material examined: 6♀, 2♂, Mian-Jangle, Fasa, Fars province, 22°12'N, 53°23'E, 1680m, ex *S. prunastri* (Boyer de Fonscolombe) (Hemiptera: Coccidae) on *Prunus scoparia* (Spach) (Rosaceae), 5.VI.2007, M. Fallahzadeh. Voucher specimens housed in EBRC.

**Genus *Dusmetia* Mercet, 1921**

***Dusmetia fuscipennis* (Noyes and Hayat, 1984)**

Host: *P. vovae* (Nasonov) (Hemiptera: Pseudococcidae) on cypress tree (Cupressaceae) (Xu and Lotfalizadeh 2000; Lotfalizadeh and Ahmadi 2000).

Iranian records: Fars province (Xu and Lotfalizadeh 2000; Lotfalizadeh and Ahmadi 2000).

**Genus *Encyrtus* Latreille, 1809**

***Encyrtus aurantii* (Geoffroy, 1785)**

Synonym in Iranian literature: *Encyrtus lecaniorum* (Mayr, 1876) (Farahbakhsh 1961; Moddarres Awal 1997; Esfandiari et al. 2005).

Hosts: *E. coryli* [*E. tiliae* (Linnaeus)] (Farahbakhsh 1961), *E. tiliae* (Hemiptera: Coccidae) on elm tree (Ulmaceae), *E. coryli* [*E. tiliae*] on apple tree (Rosaceae), *Coccus hesperidum* Linnaeus (Hemiptera: Coccidae) on *Robinia* (Papilionaceae); *Morus* (Moraceae), *Convolvulus arvensis* L. (Convolvulaceae), *S. prunastri* (Boyer de Fonscolombe) on prune tree (Rosaceae) (Davoodi et al. 2003c; Davoodi et al. 2004d), *S. prunastri* (Boyer de Fonscolombe) on *Amygdalus* (Rosaceae) (Esfandiari et al. 2005). Iranian records: Gilan, Mazandaran provinces (Farahbakhsh 1961; Moddarres Awal 1997), Gilan and Tehran provinces (Davoodi et al.

2003c, 2004d), Chaharmahal-Bakhtiyari province (Esfandiari et al. 2005), Iran (Trjapitzin, Myartseva 2004).

***Encyrtus infidus* (Rossi, 1790)**

Synonym in Iranian literature: *Encyrtus scutellatus* (Swederus, 1795) (Esfandiari 2002; Esfandiari et al. 2005).

Host: *S. prunastri* (Boyer de Fonscolombe) on *Amygdalus* (Rosaceae) (Esfandiari 2002; Esfandiari et al. 2005).

Iranian record: Chaharmahal-Bakhtiyari province (Esfandiari 2002; Esfandiari et al. 2005).

***Encyrtus trjapitzini* Myartseva and Sugonjaev, 1977**

Host: Unknown from Iran.

Iranian records: Iran (Myartseva and Sugonjaev 1977; Trjapitzin 1989).

**Genus *Epitetracnemus* Girault, 1915**

***Epitetracnemus intersectus* (Fonscolombe, 1832)**

Synonym in Iranian literature: *Anabrolepis zetterstedtii* (Westwood, 1837) (Chodjai 1989; Yazdani and Rajabi 1993; Moddarres Awal 1997).

Hosts: Soft scale (Hemiptera: Coccidae) on prune tree, Soft scale on *P. vera* L. (Anacardiaceae) (Yazdani and Rajabi 1993).

Iranian records: Tehran province (Chodjai 1989; Moddarres Awal 1997) Kerman province (Yazdani and Rajabi 1993; Moddarres Awal 1997).

**Genus *Eupoecilopoda* Novicky and Hoffer, 1953**

***Eupoecilopoda perpunctata* (Masi, 1942)**

Host: Chrysopidae (Neuroptera) on *P. vera* L. (Anacardiaceae) (Yazdani and Mehrnejad, 1993).

Iranian record: Kerman province (Yazdani and Mehrnejad 1993).

**Genus *Gyranusoidea* Compere, 1947**

**\**Gyranusoidea indica* Shafee, Alam and Agarwal, 1975**

Material examined: 3♀, 1♂, Jahrom, Fars province, ex *M. hirsutus* (Green) (Hemiptera: Pseudococcidae) on *M. alba* L. (Moraceae), 22.VII.2005, M. Fallahzadeh. Voucher specimens housed in EBRC.

***Gyranusoidea iranica* Japoshvili and**

**Fallahzadeh sp. nov. (Figures 1, 2, 3, 4)**

Female: Length (0.9-1.1 mm).

Female holotype: Length 1.013 mm. Head, thorax, abdomen and legs all yellow, except mesoscutum and scutellum with hardly noticeable narrow perpendicular brown band. Head more or less regularly reticulate on frontovertex. Scape little more than 4.7x as long as wide, in the middle with brown band which is 4.43x as wide as scape length. Ocelli forming obtuse angle. Pedicel 2.35x, F<sub>1</sub>-1.75x, F<sub>2</sub>-1.65x, F<sub>3</sub>-1.67x, F<sub>4</sub>-1.67x, F<sub>5</sub>-1.64x, F<sub>6</sub>-1.63x, Clava - 4.8x as long as wide, respectively. Eye 1.76x as long as malar space. Relative measurements (holotype): HW 341.5; HH 295.8; FV 152.5; POL 51.5; OOL 23; OCL 15.3; AOL 45.8; OD 32.6 EL 187.5; EW 105; MS 122.4.

Mesoscutum and scutellum somewhat irregularly, not polygonally reticulate. Mesoscutum almost 2x as wide as long. Scutellum 1.37 as wide as long. Thorax 0.6x as long as gaster. Postmarginal: marginal:stigmatal veins as 1.5:6:8.2.

Female paratype (slide-mounted). Relative measurement: SL 28.5; SW 6; FWL 139.3; FWW 55.4; MF 2.5; OL 44; GL 10.7.

Male: Color as in female, only antennae and genitalia different.

Material examined: Holotype: ♀, Iran, Fars province, Beyza, ex *Chorizococcus* sp. (Hemiptera: Pseudococcidae) on grape,



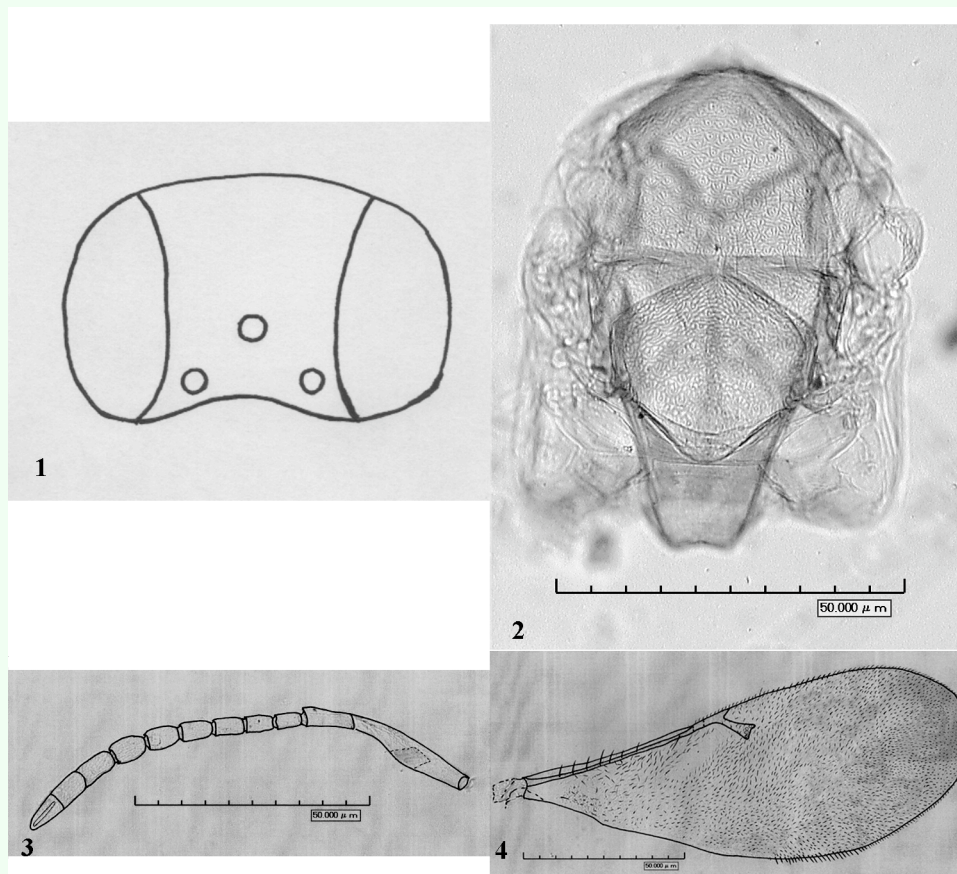

**Figure 1-4.** *Gyranusoidea iranica* Japoshvili and Fallahzadeh sp. nov female I. Head; 2. Thorax; 3. Antenna; 4. Forewing. High quality figures are available online.

September 2005, M. Fallahzadeh. Paratypes: 11♀, 2♂ same data as holotype. Holotype and paratypes in EBRC.

Comments: *G. iranica* is similar to *flava* but they can be separated using the characters given in Table 1.

#### Genus *Habrolepis* Förster, 1856

##### *Habrolepis dalmanni* (Westwood, 1837)

Host: *Melanaspis inopinata* (Leonardi) (Hemiptera: Diaspididae) on *P. vera* L. (Anacardiaceae) (Yazdani and Rajabi, 1993). Iranian record: Kerman province (Yazdani and Rajabi 1993).

##### *Habrolepis pascuorum* Mercet, 1921

Host: *Parlatoria oleae* (Colvée) (Hemiptera: Diaspididae) on Rosaceous fruit trees (Rosaceae) (Radjabi 1989).

Iranian records: Tehran, Markazi provinces (Radjabi 1989; Moddarres Awal 1997).

##### *Habrolepis tergrigorianae* Trjapitzin, 1962

Hosts: *D. prunorum* (Laing) (Hemiptera: Diaspididae) and *E. coryli* [*E. tiliae* (Linnaeus)] (Hemiptera: Coccidae) on Rosaceous fruit trees (Rosaceae) (Dastghyb Beheshti et al. 1988; Radjabi 1989; Behdad 1991; Moddarres Awal 1997; Fry 1989).

Iranian records: Isfahan province (Dastghyb Beheshti et al. 1988; Radjabi 1989; Behdad 1991; Moddarres Awal 1997), Iran (Fry 1989).

#### Genus *Homalotylus* Mayr, 1876

##### *Homalotylus albiclavatus* (Agarwal, 1970)

Host: Lady beetle larvae (Coleoptera: Coccinellidae) on *Citrus* (Rutaceae) and

*Morus* (Moraceae) (Novin 2000) associated with *N. viridis* (Hemiptera: Pseudococcidae). Iranian record: Khuzestan province (Novin 2000).

***Homalotylus ephippium* (Ruschka, 1923)**

Host: *Exochomus quadripustulatus* (L.) (Coleoptera: Coccinellidae) cypress tree (Cupressaceae) associated with *P. vovae* (Nasonov) (Hemiptera, Pseudococcidae) (Xu and Lotfalizadeh 2000; Lotfalizadeh and Ahmadi 2000).

Iranian records: Fars province (Xu and Lotfalizadeh 2000; Lotfalizadeh and Ahmadi 2000)

***Homalotylus eytelweinii* (Ratzeburg, 1844)**

Host: Lady beetle larvae (Coleoptera: Coccinellidae).

Iranian record: Karaj, Khuzestan province (Japoshvili and Noyes 2005).

***Homalotylus flaminius* (Dalman, 1820)**

Host: *Nephus bipunctatus* (Kugelann) (Coleoptera: Coccinellidae) on *Lactuca serriola* L. (Asteraceae) associated with *P. kimmericus* (Kiritshenko) (Hemiptera: Pseudococcidae) (Fallahzadeh et al. 2006a).

Iranian records: Fars province (Fallahzadeh et al. 2006a).

***Homalotylus nigricornis* Mercet, 1921**

Host: *Scymnus* sp. (Coleoptera: Coccinellidae) associated with *Aphis gossypii* (Glover) (Hemiptera: Aphididae) (Lotfalizadeh and Ebrahimi 2001).

Iranian record: Ardabil province (Lotfalizadeh and Ebrahimi 2001).

***Homalotylus quaylei* Timberlake, 1919**

Hosts: *Nephus includens* Kirsch (Coleoptera: Coccinellidae) associated with *N. viridis* (Newstead) (Hemiptera: Pseudococcidae) (Asadeh and Mossadegh 1991; Novin 2000; Novin et al. 2000), *Scymnus subvillosus* (Goeze) on *Citrus* associated with *P. citri* (Risso) (Hemiptera: Pseudococcidae) (Maafi et al. 1998).

Iranian records: Iran (OILB 1971), Khuzestan province (Asadeh and Mossadegh 1991; Novin et al. 2000), Mazandaran province (Maafi et al. 1998).

***Homalotylus sinensis* Xu and He, 1997**

Hosts: *N. bipunctatus* (Kugelann) (Coleoptera: Coccinellidae) on *L. serriola* L. (Asteraceae) associated with *P. kimmericus* (Kiritshenko) (Hemiptera: Pseudococcidae) (Fallahzadeh et al. 2006a), *Exochomus nigromaculatus* (Goeze) and *E. quadripustulatus* (L.) (Coleoptera: Coccinellidae) on cypress tree (Cupressaceae) associated with *P. vovae* (Nasonov) (Hemiptera: Pseudococcidae) (Ameri et al. 2007; Talebi et al. 2008).

Iranian records: Fars province (Fallahzadeh et al. 2006a; Ameri et al. 2007; Talebi et al. 2008).

***Homalotylus turkmenicus* Myartseva, 1981**

Host: Unknown from Iran.

Iranian record: Iran (Trjapitzin 1989).

Material examined: 1♀, 2♂, Jahrom, Fars province, 28°31'N, 53°34'E, 1280m, ex \*\**E. quadripustulatus* (L.) (Coleoptera: Coccinellidae) on grape, 2. V. 2007, M. Fallahzadeh.

**\**Homalotylus vicinus* Silvestri, 1915**

Material examined: 1♀, 2♂, Jahrom, Fars province, 28°31'N, 53°34'E, 1280m, ex \*\**N.*

**Table: I.** Characters used to separate *Gyranoidea flava* and *G. iranica*.

| <b><i>Gyranoidea flava</i> Shafee, Alam and Agarwal, 1975</b> | <b><i>Gyranoidea iranica</i> Japoshvili and Fallahzadeh sp. nov</b> |
|---------------------------------------------------------------|---------------------------------------------------------------------|
| Scape about 2.7-3x as long as broad                           | Scape about 4.6-4.75x as long as broad                              |
| Forewings about 2.3x as long as broad                         | Forewings about 2.5x as long as broad                               |
| ostmarginal 1.5x as long as stigmal or longer                 | Postmarginal little less than 1.5x as long as stigmal               |

*bipunctatus* Kugelann (Coleoptera: Coccinellidae) on grape, 5.VI.2007, M. Fallahzadeh. Voucher specimens housed in EBRC.

### Genus *Isodromus* Howard, 1887

#### *Isodromus atriventris* Ashmead, 1900

Hosts: *C. carnea* Stephens and *S. fedtchenkoi* (McLachlan) (Neuroptera: Chrysopidae) on cypress tree (Cupressaceae) associated with *P. vovae* (Nasonov) (Hemiptera: Pseudococcidae) (Xu and Lotfalizadeh 2000, Lotfalizadeh and Ahmadi 2000; Lotfalizadeh, 2000a).

Iranian records: Fars province (Xu and Lotfalizadeh 2000; Lotfalizadeh and Ahmadi 2000; Lotfalizadeh 2000a).

#### *Isodromus collimaculatus* Xu and Lotfalizadeh, 2000

Hosts: *C. carnea* Stephens and *S. fedtchenkoi* (McLachlan) (Neuroptera: Chrysopidae) on cypress tree (Cupressaceae) associated with *P. vovae* (Nasonov) (Hemiptera: Pseudococcidae) (Xu and Lotfalizadeh 2000, Lotfalizadeh and Ahmadi 2000; Lotfalizadeh 2000a).

Iranian records: Fars province (Xu and Lotfalizadeh 2000; Lotfalizadeh 2000a).

### Genus *Leptomastidea* Mercet, 1916

#### \**Leptomastidea abnormis* (Girault, 1915)

Material examined: 2♂, 2♀, Meymand, Fars province, ex *Planococcus ficus* (Signoret) (Hemiptera: Pseudococcidae) on grape, 26. VI. 2005, M. Fallahzadeh. Voucher specimens housed in EBRC.

#### *Leptomastidea alleni* Noyes and Hayat, 1994

Hosts: *N. viridis* (Newstead) (Hemiptera: Pseudococcidae) on *Citrus sinensis* (L.), *C. aurantium* (L.) (Rutaceae) and *Althaea* sp. (Malvaceae), *P. vovae* (Nasonov) (Hemiptera:

Pseudococcidae) on *Cupressus* sp. (Cupressaceae) (Fallahzadeh et al., 2008). Iranian record: Fars province (Fallahzadeh et al. 2008).

### Genus *Leptomastix* Förster, 1856

#### *Leptomastix flava* Mercet, 1921

Synonym in Iranian literature: *Leptomastix flavus* Mercet, 1921 (Kiriukhin 1947; Radjabi 1989; Behdad 1991; Moddarres Awal 1997).

Hosts: *P. aceris* (Signoret) (Hemiptera: Pseudococcidae) (Kiriukhin 1947) *P. aceris* (Hemiptera: Pseudococcidae) on Roseous fruit trees (Rosaceae) (Radjabi 1989), *Eulecanium rugulosum* (Archangelskaya) (Hemiptera: Coccidae) on *P. vera* L. (Anacardiaceae) (Yazdani and Rajabi, 1993).

Iranian records: Iran (Kiriukhin 1947), Isfahan, Tehran provinces (Radjabi 1989; Behdad 1991; Moddarres Awal 1997), Kerman province (Yazdani and Rajabi 1993). Material examined: 1♀, 1♂, Jahrom, Fars province, 28°31'N, 53°34'E, 1280m, ex *P. ficus* (Signoret) (Hemiptera: Pseudococcidae) on grape, 15.V.2007, M. Fallahzadeh.

#### \**Leptomastix dactylopii* Howard, 1885

Material examined: 2♀, 1♂, Jahrom, Fars province, 28°31'N, 53°34'E, 1280m, ex *P. ficus* (Signoret) (Hemiptera: Pseudococcidae) on grape, 13.VI.2007, M. Fallahzadeh. Voucher specimens housed in EBRC.

#### *Leptomastix histrio* Mayr, 1876

Host: *P. kimmericus* (Kiritshenko) (Hemiptera: Pseudococcidae) on *L. serriola* L. (Asteraceae) (Fallahzadeh et al. 2006b).

Iranian record: Fars province (Fallahzadeh et al. 2006b).

### Genus *Metaphycus* Mercet, 1917

#### *Metaphycus angustifrons* Compere, 1957

Host: *C. hesperidum* Linnaeus (Hemiptera: Coccidae) on *Robinia* (Papilionaceae), *Morus*

(Moraceae), *Ailanthus* (Simaroubaceae), *Diospyros* (Ebenaceae) (Davoodi et al. 2003a,c; 2004d).

Iranian records: Tehran province (Davoodi et al. 2003a, c; 2004d).

***Metaphycus anneckeii* Guerrieri and Noyes, 2000**

Host: Unknown from Iran.

Iranian record: Iran (Guerrieri and Noyes 2000).

***Metaphycus claviger* (Timberlake, 1916)**

Host: *C. hesperidum* Linnaeus (Hemiptera: Coccidae) on *Citrus* (Rutaceae) and apple tree (Rosaceae) (Davoodi et al. 2004a, b).

Iranian records: Fars province (Davoodi et al. 2004a, b).

***Metaphycus flavus* (Howard, 1881)**

Host: *C. hesperidum* Linnaeus (Hemiptera: Coccidae) (Herting 1972).

Iranian records: Iran (Herting, 1972; Guerrieri and Noyes 2000).

***Metaphycus helvolus* (Compere, 1926)**

Host: *Saissetia oleae* (Olivier) (Hemiptera: Coccidae) (Esmaili 1983; Moddarres Awal 1997).

Iranian records: Caspian sea area (Esmaili 1983; Moddarres Awal 1997), Iran (Prinsloo 1984; Trjapitzin 1989; Noyes and Hayat 1994).

***Metaphycus hodzhevanishvili* Yasnosh, 1972**

Host: *Stotzia ephedrae* (Newstead) (Hemiptera: Coccidae) on *Ephedra procera* Fisch. Et Mey (Ephedraceae) (Hesami et al. 2007).

Iranian record: Fars province (Hesami et al. 2007).

***Metaphycus lounsburyi* (Howard, 1898)**

Host: *S. oleae* (Olivier) (Hemiptera: Coccidae) (Esmaili 1983; Moddarres Awal 1997).

Iranian records: Caspian sea area (Esmaili 1983; Moddarres Awal 1997), Iran (Noyes and Hayat 1994).

***Metaphycus pulvinariae* (Howard, 1881)**

Host: *Didesmococcus unifasciatus* (Archangelskeya) on *Amygdalus* (Rosaceae) (Davoodi et al. 2004a).

Iranian record: East Azerbaijan (Davoodi et al. 2004a).

***Metaphycus punctipes* (Dalman, 1820)**

Hosts: *E. coryli* [*E. tiliae* (Linnaeus)] (Hemiptera: Coccidae) on quince tree (Rosaceae) (Ebrahimi 1993), *S. prunastri* (Boyer de Fonscolombe) (Hemiptera: Coccidae) on *Amygdalus* (Rosaceae) (Esfandiari et al. 2005).

Iranian records: Iran (OILB 1971), Chaharmahal-Bakhtiyari province (Ebrahimi 1993; Esfandiari et al. 2005).

***Metaphycus stanleyi* Compere, 1940**

Host: *S. oleae* (Olivier) (Hemiptera: Coccidae) (Esmaili 1983; Moddarres Awal 1997).

Iranian records: Caspian sea area (Esmaili 1983; Moddarres Awal 1997).

***Metaphycus zebratus* (Mercet, 1917)**

Host: *Parthenolecanium* sp. (Hemiptera: Coccidae).

Iranian record: Iran (OILB 1971).

**Genus *Microterys* Thomson, 1876**

***Microterys hortulanus* Erdős, 1956**

Hosts: *S. prunastri* (Boyer de Fonscolombe) (Hemiptera: Coccidae) on plum tree (Rosaceae), *D. unifasciatus* (Archangelskaya) (Hemiptera: Coccidae) on *Amygdalus*

(Rosaceae), *E. coryli* [*E. tiliae* (Linnaeus)] (Hemiptera: Coccidae) on plum tree (Rosaceae) (Davoodi et al. 2002, 2004d).

Iranian records: East Azerbaijan and Tehran provinces (Davoodi et al. 2002; 2004d).

***Microterys iranica* Japoshvili and Fallahzadeh sp. nov.** (Figures 5, 6, 7, 8, 9)

Female holotype. Length 2.3 mm. Head yellow, except brown band across vertex back margin behind posterior ocelli. Eyes violet. Scape, pedicel, and flagellar segments 1-3

yellow, F<sub>4-6</sub> white, clava brown. Pronotum, mesopleuron, and axilla yellow, only area where axillae join brown. Mesoscutum with green-silver and scutellum with violet-silver, almost black, metallic reflection. Propodeum, metanotum, and abdomen brown, with some violet-silver metallic reflections. Legs yellow, hind coxa brown.

Head about 1.4x as wide as high and about 3.67x as wide as FV; FV in dorsal view almost 2x as long as wide. OOL almost 2.3x shorter than OCL and POD. Ocelli forming

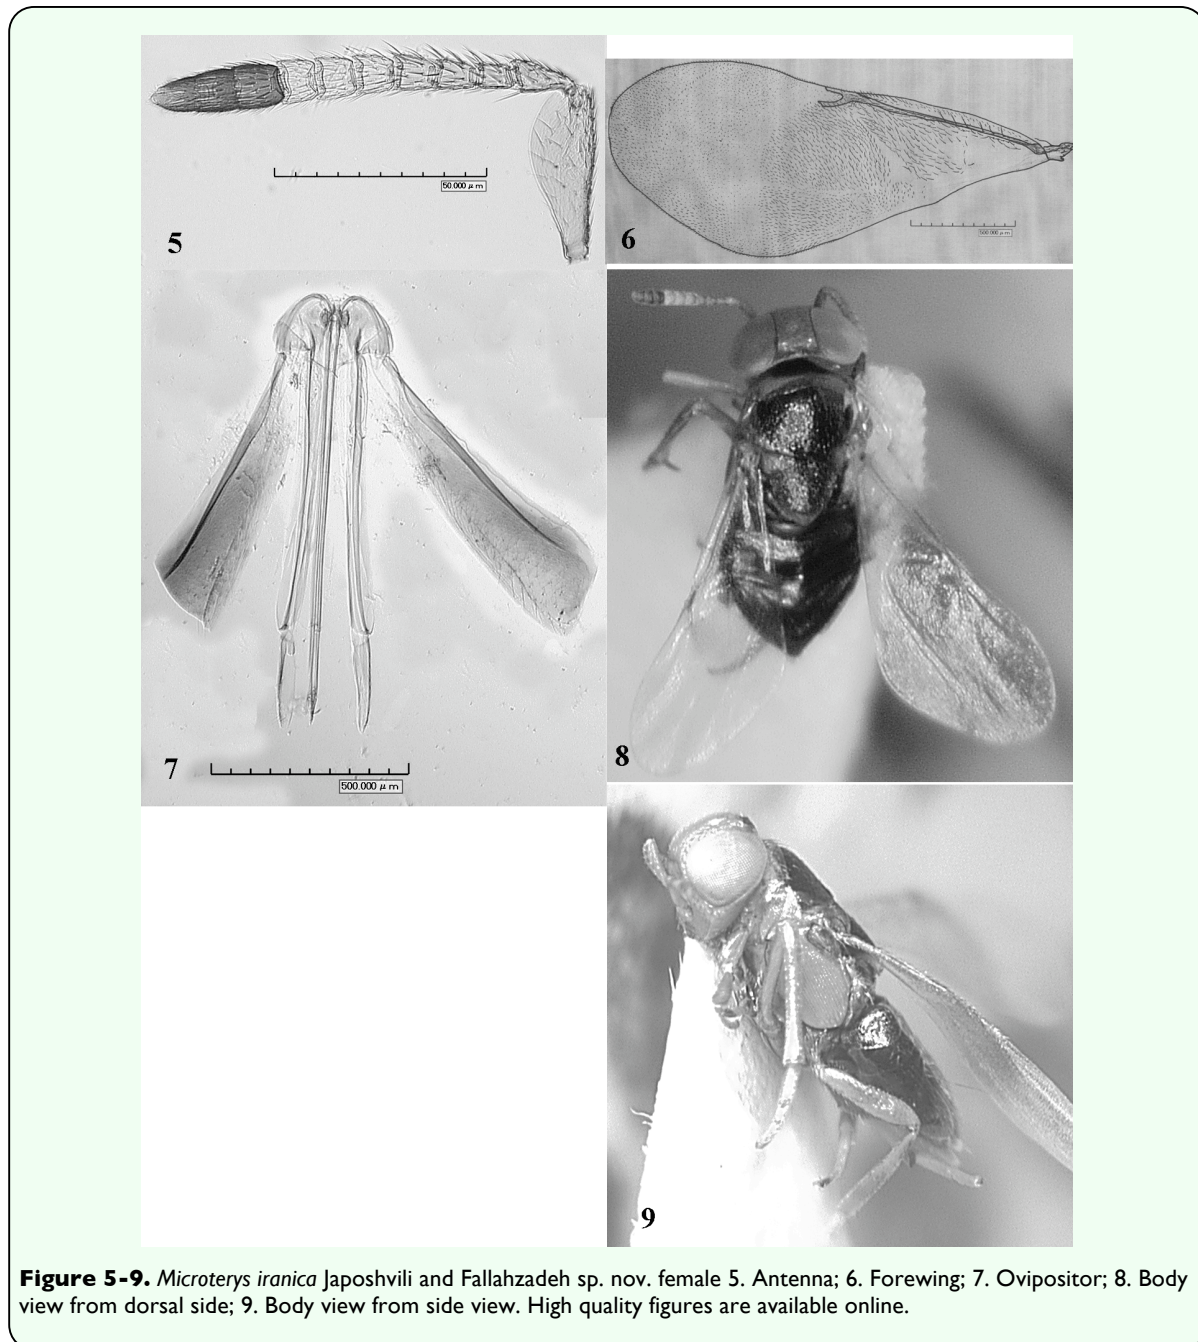

equilateral triangle. Scape about 3x as long as wide. Pedicel 1.8x as long as wide;  $F_1$  0.57x as long as pedicel and 1.2x as long as wide.  $F_2$  1.24x as long as  $F_1$ .  $F_2$  -1.44x,  $F_3$  - 1.15x,  $F_4$  - 1.07x,  $F_5$  - 1,  $F_6$  - 0.9x as long as wide respectively. The longest segment is  $F_2$  and shortest  $F_1$ . Toruli separated from each other by 1.56x and from clypeal margin 1.17x their maximum diameter. Upper margin of toruli in same line as lowest eye margin. Relative measurement (holotype): HW 399.8; FV 107.5; OD 24; POL 8.1; OOL 52.5; OCL 26.4; AOL 45; MS 136.4; EL 213.7; 135.7.

Mesoscutum and scutellum flat, of equal length, scutellum as long as wide, mesoscutum 1.35x as wide as long. Fore wing 2.3x as long as wide. Submarginal vein with 17 setae. Submarginal, marginal, postmarginal and stigmal veins as 9.6:1.34:1:1.4. Band on the forewing not clear, wings infuscate on basal 0.64x, hyaline apical part 0.36x as long as wing. Midtibial spur 0.84x as long as basitarsus.

Female paratype (slide-mounted). Relative measurements: SL 42; SW 15.3; FWL 295.5; FWW 132.6; OL 80.5; GL 17.8; OPL 60.5; OPW 17.2.

Male: Head, mesoscutum, scutellum black with green-golden metallic reflection. Antenna yellow, pedicel brown dorsally. Tegula and mesopleuron yellow. Pedicel more than 3 times shorter than that of  $F_1$ . Abdomen, metanotum and propodeum brown with green-violet metallic reflection.

Material examined: Holotype: ♀, Iran, Fars province, Mian-Jangle, Fasa, 22°12'N, 53°23'E, 1680m, ex *Sphaerolecanium prunastri* (Hemiptera: Coccidae), on *Prunus scoparia*, 2.VII.2007, M. Fallahzadeh. Paratypes: 2♀, 1♂ same data as holotype. Holotype and paratypes in EBRC.

Comments: *Microterys iranicus* is most close to *M. darevskii* Trjapitzin, 1968 but they

can be separated using the characters given in Table 2.

#### ***Microterys lunatus* (Dalman, 1820)**

Host: *E. coryli* [*Eulecanium tiliae* (Linnaeus)] (Hemiptera: Coccidae) on *Malus* (Rosaceae) (Chodjai 1968; Chodjai 1989).

Iranian records: Fars province (Chodjai 1968; Chodjai 1989; Ebrahimi 1993; Moddarres Awal 1997), Iran (OILB 1971).

#### ***Microterys masii* Silvestri, 1919**

Host: *Parthenolecanium* sp. (Hemiptera: Coccidae) (OILB 1971).

Iranian record: Iran (OILB 1971).

#### ***Microterys nietneri* (Motschulsky, 1859)**

Host: *C. hesperidum* L. (Hemiptera: Coccidae) (Farahbakhsh 1961; Davoodi et al. 2004d).

Iranian records: Mazandaran province (Farahbakhsh 1961), Tehran province (Davoodi et al. 2004d).

#### ***Microterys nuticaudatus* Xu, 2000**

Host: *Parthenolecanium corni* (Bouche) (Hemiptera: Coccidae) on *Morus* (Moraceae) (Davoodi et al. 2003b, 2004a).

Iranian records: East Azerbaijan and Tehran provinces (Davoodi et al. 2003b, 2004a).

#### **Genus *Ooencyrtus* Ashmead, 1900**

##### ***Ooencyrtus cinctus* Prinsloo, 1987**

Host: *Bucculatrix ulmella* Zeller (Lepidoptera: Bucculatricidae) on elm tree (Ulmaceae) (Baniameri and Mohammadi-Pour 2007).

Iranian record: Tehran province (Baniameri and Mohammadi-Pour 2007).

##### ***Ooencyrtus kuvanae* (Howard, 1910)**

Hosts: *C. carnea* Stephens and *S. fedtchenkoi* (McLachlan) (Neuroptera: Chrysopidae) on cypress tree (Cupressaceae) (Xu and

Lotfalizadeh 2000; Lotfalizadeh and Ahmadi 2000; Lotfalizadeh 2000a).

Iranian records: Fars province (Xu and Lotfalizadeh 2000, Lotfalizadeh and Ahmadi 2000; Lotfalizadeh 2000a).

### ***Ooencyrtus masii* (Mercet, 1921)**

Host: *Ocneria terebinthina* Stgr. (Lepidoptera: Lymantriidae) on wild pistachio trees (Anacardiaceae) (Sabahi et al. 1998, 1999; Omid et al. 2005).

Iranian records: Fars province as *Ooencyrtus* cf *masii* (Sabahi et al. 1998, 1999), Khojir protected area (Omid et al. 2005).

### ***Ooencyrtus nigerrimus* Ferrière and Voegelé, 1961**

Host: *Eurygaster integriceps* Puton (Hemiptera: Scutelleridae) (Radjabi and Amir-Nazari 1989; Moddarres Awal, 1997).

Iranian records: Tehran, Hamadan, Lorestan, Markazi provinces (Radjabi and Amir-Nazari 1989; Moddarres Awal 1997).

### ***Ooencyrtus telenomicida* (Vassiliev, 1904)**

Hosts: *Aelia* sp. (Hemiptera: Pentatomodae), *Eurygaster* sp. (Scutelleridae) on *Triticum aestivum* L. (Gramineae) (Chodjai 1968; Chodjai 1989; Davatchi and Chodjai 1969), *E. integriceps* Puton, *Aelia* sp., *Dolycoris bacarum* (L.), *Carpocoris fuscipinus* (Boheman) and *Macrocerus marginatus* (Hemiptera: Pentatomidae) on cereal fields (Gramineae) (Radjabi and Amir-Nazari 1989; Moddarres Awal 1997), *E. integriceps* (Iranipour et al. 1998), *Acrosternum* spp. and *Brachynema* spp. on *P. vera* L. (Anacardiaceae) (Hashemi Rad et al. 2002), *E. integriceps* on cereal fields (Gramineae).

Iranian records: Tehran, Hamadan, Lorestan, Mazandaran, Markazi provinces (Chodjai 1968; Chodjai 1989; Davatchi and Chodjai 1969; Radjabi and Amir-Nazari 1989; Moddarres Awal 1997); East Azerbaijan (Iranipour et al. 1998), Kerman province (Hashemi Rad et al. 2002), Qazvin province (Noori et al. 2003), Iran (Herting 1971; Trjapitzin 1989; Zhang and Huang 2005).

### **Genus *Paranathrix* Myartseva, 1980**

#### **\**Paranathrix tachikawai* (Shafee, Alam and Agarwal, 1975)**

Material examined: 6♀, 1♂, Minab, Hormozgan province, ex *Ferrisia virgata* (Ceckerell) (Hemiptera: Pseudococcidae) on *Althea* 9.X.2007, M. Fallahzadeh. Voucher specimens housed in EBRC.

### **Genus *Paraphaenodiscus* Girault, 1915**

#### ***Paraphaenodiscus sugonjaevi* Myartseva, 1980**

Host: Unknown from Iran.

Iranian records: Iran (Myartseva 1980; Trjapitzin 1989).

### **Genus *Prionomitus* Mayr, 1876**

#### ***Prionomitus mitratus* (Dalman, 1820)**

Host: *A. pistaciae* (Burckhardt and Lauterer) (Hemiptera: Psyllidae) on *P. vera* L. (Anacardiaceae) (Dezianian and Sahragard 2000; 2004).

Iranian record: Semnan province as *Prionomitus* near *mitratus* (Dezianian and Sahragard 2000; 2004).

### **Genus *Prochiloneurus* Silvestri, 1915**

#### ***Prochiloneurus aegyptiacus* (Mercet, 1929)**

Hosts: *H. quaylei* Timberlake (Hymenoptera:

**Table 2.** Characters used to separate *Microterys darevskii* and *M. iranicus*.

| <b><i>Microterys darevskii</i> Trjapitzin, 1968</b> | <b><i>Microterys iranicus</i> Japoshvili and Fallahzadeh sp. nov.</b> |
|-----------------------------------------------------|-----------------------------------------------------------------------|
| F5-6 almost white                                   | F4-6 almost white                                                     |
| Hind tibia with two ring like dark band             | Hind tibia without bands                                              |
| Marginal vein 2.5x as long as wide                  | Marginal vein 3x as long as wide                                      |
| Midtibial spur as long as basitarsus                | Midtibial spur 0.84x as long as basitarsus                            |

Encyrtidae) (OILB 1971), Parasitoid of *Anagyrus* spp. (Hymenoptera: Encyrtidae) (Hesami and Fallahzadeh 2004), Hyperparasitoid of *M. hirsutus* (Green) (Hemiptera: Pseudococcidae) on *M. alba* L. (Moraceae) (Fallahzadeh et al. 2007).

Iranian records: Iran (OILB 1971), Fars province (Hesami and Fallahzadeh 2004; Fallahzadeh et al. 2007).

**\**Prochiloneurus bolivari* Mercet, 1919**

Material examined: 2♀, Jahrom, Fars province, 28°31'N, 53°34'E, 1280m, ex *P. ficus* (Signoret, 1875) (Hemiptera: Pseudococcidae) on grape, 19.VII.2007, M. Fallahzadeh. Voucher specimens housed in EBRC.

***Prochiloneurus indicus* Shafee, Alam and Agarwal, 1975**

Host: Hyperparasitoid *N. viridis* (Newstead) (Hemiptera: Pseudococcidae) (Asadeh and Mossadegh 1991) on *Citrus* (Rutaceae) and *M. alba* L. (Moraceae).

Iranian record: Khuzestan province (Asadeh and Mossadegh 1991).

***Prochiloneurus pulchellus* Silvestri, 1915**

Host: *Pseudococcus* on *Tamarix* (Tamaricaceae) (Japoshvili and Noyes 2005).

Iranian record: Khuzestan province (Japoshvili and Noyes 2005).

**Genus *Psyllaephagus* Ashmead, 1900**

***Psyllaephagus claripes* Trjapitzin, 1967**

Host: *Psyllopsis repens* Loginova (Hemiptera: Psyllidae) on *Fraxinus* (Oleaceae) (Rajabi Mazhar et al. 2004; Rajabi Mazhar and Sadeghi 2006).

Iranian records: Hamadan province (Rajabi Mazhar et al. 2004; Rajabi Mazhar and Sadeghi 2006).

***Psyllaephagus pistaciae* Ferrière, 1961**

Host: *Agonoscena pistaciae* (Burckhardt & Lauterer) (Hemiptera: Psyllidae) on *P. vera* L. (Anacardiaceae) (Ferrière 1961; Ebrahimi et al. 1998; Emami and Mehrnejad 2002, 2004, 2006; Mehrnejad 2002a,b,c, 2008; Mehrnejad and Copland 2006, 2007).

Iranian records: Iran (Ferrière 1961; Herting 1972; Trjapitzin 1989), Kerman province (Mehrnejad et al. 1995; Ebrahimi et al. 1998; Emami and Mehrnejad 2002; Emami and Mehrnejad 2004, 2006; Mehrnejad 2002a,b,c, 2008; Mehrnejad and Copland 2006, 2007).

***Psyllaephagus stenopsyllae* (Tachikawa, 1963)**

Host: *Diaphorina citri* Kuwayama (Hemiptera: Psyllidae) on *Citrus* (Rutaceae).

Iranian record: Hormozghan province (Ameri et al. 2006).

***Psyllaephagus zdeneki* Noyes and Fallahzadeh, 2005**

Host: *Euphyllura pakistanica* Loginova, 1973 (Hemiptera: Psyllidae) on *Oleae europea* L. (Oleaceae) (Noyes and Fallahzadeh 2005).

Iranian record: Fars province (Noyes and Fallahzadeh 2005).

**Genus *Syrphophagus* Ashmead, 1900**

***Syrphophagus aeruginosus* (Dalman, 1820)**

Hosts: *Sphaerophoria* spp., *Eopodes corollae* (Fab.) and *Episyrphus balteatus* (DeGeer) (Diptera: Syrphidae) (Xu and Lotfalizadeh 2000; Lotfalizadeh 2000b).

Iranian records: East Azerbaijan Province (Xu and Lotfalizadeh 2000; Lotfalizadeh 2000b).

***Syrphophagus aphidivorus* (Mayr, 1876)**

Hosts: Hyperparasitoid of *Agonoscena pistaciae* (Burckhardt and Lauterer) (Hemiptera: Psyllidae) on *P. vera* L. (Anacardiaceae) (Yazdani and Mehrnejad 1993; Ebrahimi et al. 1998; Mehrnejad 2000b; Emami and Mehrnejad 2002, 2004, 2006;



Mehrnejad and Emami 2005), Hyperparasitoid of *Aphis craccivora* Koch., **A. gossypii** (Glover), (Hemiptera: Aphididae) on *Alhagi camlorum* Fisch. and *Glycyrrhiza glabra* L. (Papilionaceae) in pistachio orchards (Emami and Mehrnejad 2004, 2006; Mehrnejad and Emami 2005), Hyperparasitoid of *Chromaphis juglandicola* (Hemiptera: Aphididae) (Rakhshani et al. 2004) Hyperparasitoid of *Pauesia antennata* (Mukerji) (Hymenoptera: Braconidae: Aphidiinae) (Rakhshani et al. 2005).

Iranian records: Kerman province (Yazdani and Mehrnejad 1993; Ebrahimi et al. 1998; Mehrnejad 2000b; Emami and Mehrnejad 2002, 2004, 2006; Mehrnejad and Emami 2005); Tehran province (Rakhshani et al. 2004); Sistan and Baluchistan province (Rakhshani et al. 2005); Iran (Japoshvili, Abrantes 2006).

### Genus *Trechnites* Thomson, 1876

#### *Trechnites insidiosus* (Crawford, 1910)

Host: *Psylla pyricola* [***Cacopsylla pyricola*** (Foerster)] (Hemiptera: Psyllidae) (Behdad 1991)

Iranian record: Tehran province (Behdad 1991).

### Genus *Zaomma* Ashmead, 1900

#### *Zaomma lambinus* (Walker, 1838)

Synonyms in Iranian literatures: *Apterencyrtus microphagus* (Mayr 1876), *Chiloneurus microphagus* Mayr, 1876, *Chiloneurinus microphagus* (Mayr 1876) (Chodjai 1989; Radjabi 1989; Moddarres Awal 1997).

Hosts: *Lepidosaphes malicola* Borchsenius (Hemiptera: Diaspididae) on Roseous fruit trees (Rosaceae) (Chodjai 1989; Radjabi 1989; Moddarres Awal 1997), *Tecaspis asiatica* [*Chlidaspis asiatica* (Archangelskaya)] (Hemiptera: Diaspididae) on Roseous fruit trees (Rosaceae) (Radjabi 1989); *Lepidosaphes pistaciae*

Archangelskaya (Hemiptera: Diaspididae) on *P. vera* L. (Anacardiaceae) (Mansouri 2005). Iranian records: Tehran province (Chodjai 1989; Moddarres Awal 1997), Chahar Mahalo/ Bakhtiari, Esfahan, Fars, Markazi, Tehran, Semnan provinces (Radjabi 1989; Moddarres Awal 1997), Esfahan province (Mansouri 2005).

### Acknowledgements

The authors would like to thank Dr. Wojciech J. Pulawski (Department of Entomology, California Academy of Sciences, San Francisco, California) for comments on the manuscript. This research was supported by Islamic Azad University, Jahrom Branch, Iran and Suleyman Demirel University, Isparta, Turkey.

**Editor's note:** Paper copies of this article will be deposited in the following libraries. The date of publication is given in 'About the Journal' on the JIS website.

Universitaetsbibliothek Johann Christian Senckenberg, Frankfurt Germany; National Museum of Natural History, Paris, France; Field Museum of Natural History, Chicago, Illinois USA; University of Wisconsin, Madison, USA; University of Arizona, Tucson, Arizona USA; Smithsonian Institution Libraries, Washington D.C. USA; The Linnean Society, London, England.

### References

- Ameri A, Talebi AA, Xu ZH, Rakhshani E. 2006. Report of *Psyllaephagus stenopsyllae* (Hym., Encyrtidae) from Iran. *Journal of Entomological Society of Iran* 25 (2): 83-84.
- Ameri A, Talebi AA, Fathipour Y, Rakhshani E. 2007. First Record of the Ladybeetle Parasitoid species *Homalotylus sinensis* in

Iran (Hymenoptera: Encyrtidae). *Entomologia Generalis* 30 (4): 307–310.

Asadeh GA, Mossadegh MS. 1991. An investigation of the mealybug (*Pseudococcus* spp.) natural enemies fauna in the Khuzestan's province. In: *Proceedings of the 10th Iranian Plant Protection Congress*, p.3. Kerman, 1-5 September 1991, Kerman, University of Shahid Bahonar, Iran.

Asadeh GhA, Mossadegh MS. 1993. Important natural enemies of mealybugs (*Pseudococcus* spp.) in the Khuzestan province Iran. *The Scientific Journal of Agriculture Shahid Chamran University* 16 (1, 2): 46-52.

Baniameri V, Mossadegh MS. 1998a. Comparison of the efficiency of the two encyrtid parasitoids *Anagyrus dactylopii* and *Anagyrus agragensis* (Hym.: Encyrtidae) on *Nipaecoccus viridis* (Hom.: Pseudococcidae). In: *Proceedings of the 13th Iranian Plant Protection Congress*, p. 115. Karaj, 23- 27 August 1998 Karaj, Karaj Junior College of Agriculture, Iran.

Baniameri V, Mossadegh MS. 1998b. The biology of encyrtid parasitoid *Anagyrus agragensis* (Hym.: Encyrtidae) on *Nipaecoccus viridis* (Hom.: Pseudococcidae). In: *Proceedings of the 13th Iranian Plant Protection Congress*, p. 116. Karaj, 23- 27 August 1998 Karaj, Karaj Junior College of Agriculture, Iran.

Baniameri V, Mohammadi Pour A. 2007. New records of three parasitoids wasps on *Bucculatrix ulmella* Zeller (Lep.: Bucculatricidae) from Iran. *Applied Entomology & Phytopathology* 75 (1): 37.

Behdad E. 1991. *Pests of Fruit Crop in Iran*, Second Edition. Neshat Publishing, Esfahan, Iran.

Behdad E, Barouti S. 1978. Biological studies on *Eulecanium coryli* L., the pest of fruit trees in Esfahan. *Entomologie et Phytopathologie Appliquées*, 46(1, 2): 54-65.

Chojai M. 1968. Résultats de l'étude faunistique des Hyménoptères parasites (Terebrants) en Iran et l'importance de leur utilisation dans la lutte biologique. p. 25-35 in *Proceedings of the first Iranian Plant Protection Congress*, 13-18 September 1968 Karaj, Tehran University, Iran.

Chojai M. 1976. *Entomology (Ontogeny & Biology)*. Vol. II, Tehran University Publishing, Iran.

Chojai M. 1989. *Entomology (Ethology, Social Life & Natural Enemies) (Biological Control)*. Vol. III., Second Edition. Tehran University Publishing, Iran.

Dastgheyb-Beheshti N, Behdad E, Barouti S. 1988. Some biological studies on *Diaspidiotus prunorum* in Esfahan. *Entomologie et Phytopathologie Appliquées* 55 (1, 2): 123-130.

Davatchi A, Chojai M. 1969. *Les Hyménoptères entomophages de l'Iran (études faunistiques)*. 107:1-88. Faculty Agriculture, Tehran University Publishing, Iran.

Davoodi A, Talebi AA, Rajabi G, Fathipour Y. 2002. The first report of *Microterys hortulanus* (Hym.: Encyrtidae) from Iran. *Journal of Entomological Society of Iran* 22(1): 85-86.

Davoodi A, Talebi AA, Radjabi G, Fathipour Y, Xu Z. 2003a. Report of *Metaphycus angustifrons* Compère (Hym.: Encyrtidae), parasitoid of *Coccus hesperidum* (L.) (Hom.: Coccidae) from Iran. *Journal of Entomological Society of Iran* 22(2): 79-80.

Davoodi A, Talebi AA, Malkeshi H, Radjabi G, Xu Z. 2003b. The first report of *Microterys nuticaudatus* from Iran. *Applied Entomology & Phytopathology* 71 (2), 149-150.

Davoodi A, Talebi AA, Radjabi G, Fathipour Y. & Moharrampour, S. (2003c) Identification of parasitoid wasps of the brown soft scale, *Coccus hesperidum* (L.) (Hom.: Coccidae) in Tehran province, Iran. In: *Proceedings of the second Applied-Scientific Seminar on Flowers & Ornamental Plants in Iran*, p.7. Mahalat 15- 16 October 2003 Mahalat, Iran.

Davoodi A, Talebi AA, Fathipour Y, Daneshvar S, Radjabi G. 2004a. Study on the morphological features of four new species of scale insects parasitoids (Hymenoptera: Chalcidoidea) from Iran. *Agricultural Science, Tabriz* 14(3): 51-66.

Davoodi A, Talebi AA, Radjabi G, Fathipour Y, Moharrampour S. 2004b. Report of *Metaphycus claviger* (Hym.: Encyrtidae) from Iran. *Journal of Entomological Society of Iran* 23(2): 129-130.

Davoodi A, Talebi AA, Rajabi G, Fathipour Y, Xu Z. 2004c. The first report of *Metaphycus pulvinariae* (Howard) (Hym.: Encyrtidae) from Iran. *Applied Entomology & Phytopathology* 71(2): 149-150.

Davoodi A, Talebi AA, Rajabi GR, Fathipour Y, Rezaei V, Rakhshani E. 2004d. An identification of parasitoids and

hyperparasitoids of the most common soft scales (Hom.:Coccidae) in Tehran and Guilan provinces. *Iranian Journal of Agricultural Sciences* 35(4): 887-899.

Dezhakam M, Soleyman Nejadian E. 2000. Investigatin on the behavior of *Crematogaster antaris* (Hym.: Formicidae) from *Nipaecoccus viridis* (New.) against parasitism. In: *Proceedings of the 14th Iranian Plant Protection Congress*, p. 91. Isfahan, 5-8 September 2000 Isfahan, Isfahan University of Technology, Iran.

Dezianian A, Sahragard A. 2000. Investigation on natural enemies of the pistacia psyllid, *Agonoscena pistaciae* in Damgan- Iran. In: *Proceedings of the 14th Iranian Plant Protection Congress, Isfahan*, p. 270. 5-8 September 2000 Isfahan, Isfahan University of Technology, Iran.

Dezianian A, Sahragard H. 2004. Biology and natural enemies of pistachio psyllid, *Agonoscena pistaciae* in Dameghan region, *Journal of Agricultural Science* 1(5): 83-92.

Ebrahimi E. 1993. An introduction to the new six parasitoid wasps for the fauna of Iran. *Journal of Entomological Society of Iran* 12/13: 25.

Ebrahimi SH, Shahid Zandi KH, Mehrnejad MR. 1998. Population fluctuation of natural enemies of pistachio psylla (*Agonoscena targionii* Licht.). In: *Proceedings of the 13th Iranian Plant Protection Congress*, p. 106. Karaj, 23- 27 August 1998 Karaj, Karaj Junior College of Agriculture, Iran.

Emami SY, Mehrnejad MR. 2002. Host selection behavior in three hyperparasitoids of the common pistachio psylla, *Agonoscena pistaciae*. In: *Proceeding of the 15th Iranian*

*Plant Protection Congress*, p. 176.  
Kermanshah, 7-11 September 2002  
Kermanshah, Razi University of Kermanshah,  
Iran.

Emami SY, Mehrnejad MR. 2004. The situation of weed aphids parasitoids in pistachio orchards of Kerman province. In: *Proceeding of the 16th Plant Protection Congress of Iran*, p.19. Tabriz 28 August-1 September 2004 Tabriz, Iran, University of Tabriz.

Emami SY, Mehrnejad MR. 2006. Weed aphids and their parasitoids in pistachio orchards in Kerman Province. *Acta Horticulturae* 726: 437-439.

Esfandiari H. 2002. *Investigation on the natural enemies and biology of Sphaerolecanium prunastri (Boyer de Fonscolombe) on almond in Shahrekord*. 67pp. M. Sc. Thesis of Entomology, Islamic Azad University, Science & Reserch Branch, Iran.

Esfandiari H, Radjabi G, Shojaee M, Ebrahimi E, Bagheri M, Ostovan H. 2005. Investigation on the natural enemies of *Sphaerolecanium prunastri* Fonsc. On almond in Shahrekord, Iran. In: *IV International Symposium on Pistachio & Almonds*, p. 23. 22-25 May 2005 Tehran, Iran.

Esmaili M. 1983. *The Important Pest of Fruit Trees*. Sepehr Publishing, Tehran, Iran.

Fallahzadeh M, Hesami S. 2004. Study of the natural enemies of *Maconellicoccus hirsutus* (Homoptera: Pseudococcidae) in Jahrom region of Fars province. In: *Proceeding of the 16th Plant Protection Congress of Iran*, p. 47. Tabriz 28 August-1 September 2004 Tabriz, University of Tabriz, Iran.

Fallahzadeh M, Shojaei M, Ostovan H, Kamali K. 2006a. The first report of two parasitoid wasps on the larvae of *Nephus bipunctatus* (Col.: Coccinellidae) from Iran. *Journal of Entomological Society of Iran* 26(1): 95-96.

Fallahzadeh M, Shojaei M, Ostovan H, Kamali K. 2006b. The first report of four parasitoid wasps on *Peliococcus kimmericus* (Hem.: Pseudococcidae) from Iran. *Journal of Entomological Society of Iran* 26(1): 97-98.

Fallahzadeh M, Shojaei M, Ostovan H, Kamali K. 2007. Study of the parasitoids and hyperparasitoids of *Maconellicoccus hirsutus* (Hem., Pseudococcidae) in Fars province, *Journal of Agricultural Sciences, Islamic Azad University* 13(3): 593-609.

Fallahzadeh M, Shojaei M, Ostovan H, Kamali K. 2008. The first report of the genus and species of *Leptomastidea alleni* (Hym.: Encyrtidae) from Iran. *Journal of Entomological Society of Iran* 27(2): 13-14.

Farahbakhsh G. 1961. Checklist of important insect and other enemies of plants and agricultural products in Iran. Ministry of Agriculture, Department of Plant Protection, Tehran, Iran.

Ferrière C. 1961. Encyrtides paléarctiques parasites de psylles. *Entomophaga* 6(1): 43.

Fry JM. 1989. *Natural enemy databank, 1987. A catalogue of natural enemies of arthropods derived from records in the CIBC Natural Enemy Databank*. CAB International.

Guerrieri E, Noyes JS. 2000. Revision of European species of genus *Metaphycus* Mercet (Hymenoptera: Chalcidoidea:

Encyrtidae), parasitoids of scale insects. *Systematic Entomology* 25: 208.

Guerrieri E, Noyes JS. 2005. Revision of the European species of *Copidosoma* Ratzeburg (Hymenoptera: Encyrtidae), parasitoids of caterpillars (Lepidoptera). *Systematic Entomology* 30,135.

Gibson G, Huber J, Woolley J. 1997. *Annotated Key to the Genera of Nearctic Chalcidoidea (Hymenoptera)*. NRC Research Press.

Haeselbarth E. 1983. Determination list of entomophagous insects. Nr. 9. *Bulletin. Section Regionale Ouest Palaearctique, Organisation Internationale de Lutte Biologique*. 6(1): 22-23.

Hashemi Rad H, Soleyman Najadian E, Radjabi G. 2002. Population fluctuation of green stink bugs (*Brachynema* spp. & *Acrosternum* spp.) and their egg parasitoids in Rafsanjan. In: *Proceeding of the 15th Iranian Plant Protection Congress*, p. 179. Kermanshah, 7-11 September 2002 Kermanshah, Razi University of Kermanshah, Iran.

Herting B. 1971. Arachnida to Heteroptera. *A catalogue of parasites and predators of terrestrial arthropods. Section A. Host or Prey/Enemy*. Commonwealth Agricultural Bureaux.

Herting B. 1972. Homoptera. *A catalogue of parasites and predators of terrestrial arthropods. Section A. Host or Prey/Enemy*. Commonwealth Agricultural Bureaux, Slough, England.

Hesami S, Fallahzadeh M. 2004. Study of the natural enemies of the citrus mealybug

*Nipaecoccus viridis* (Homoptera: Pseudococcidae) in Jahrom region of Fars province. In: *Proceeding of the 16th Plant Protection Congress of Iran*, p. 50. Tabriz 28 August-1 September 2004 Tabriz, University of Tabriz, Iran.

Hesami S, Fallahzadeh M. 2005. Recorded species of mealybug parasitoids of the genus *Anagyrus* (Hymenoptera; Encyrtidae) from Fars province of Iran. *Caspian Journal of Environmental Sciences* 3(1): 63-68.

Hesami S, Ebrahimi E, Ostovan H, Shojai M, Kamali K, Moghaddam M. 2007. The first report of *Metaphycus hodzhvanishvili* Yasnosh (Hymenoptera: Encyrtidae) from Iran. *Applied Entomology & Phytopathology* 75 (1): 41.

Hesami, S., Mohammadi Khoramabadi, A. and Seyedebrahimi, S. 2008. Report of two chalcid wasps (Hymenoptera: Chalcidoidea) from fig soft scale in Iran. *Journal of Entomological society of Iran* 28 (1): 79-80.

Hoffer A. 1970. Bemerkungen zu drei wenig bekannten Arten der Familie Encyrtidae (Hymenoptera: Chalcidoidea) und Beschreibungen der weiteren, für die Wissenschaft neuen Taxa. *Studia Entomologica Forestalia* 1(12):191-193.

Iranipour S, Kharrazi Pakdel A, Esmaili M, Rajabi G. 1998. Introduction of a chalcid species from Eupelmidae for Iran. In: *Proceedings of the 13th Iranian Plant Protection Congress, Karaj*, p. 5. 23- 27 August 1998 Karaj, Karaj Junior College of Agriculture, Iran.

Japoshvili G. 2005. A new species of Encyrtid *Psilophrys ghilarovi* (Hymenoptera,

Chalcidoidea, Encyrtidae) from Turkey. *Zoologicheskyy Zhurnal* 84(4): 524-527.

Japoshvili G. 2007a. New records of Encyrtidae (Hymenoptera, Chalcidoidea) with the description of three new species from Georgia. *Caucasian Entomological Bulletin* 3(1): 81-84.

Japoshvili G. 2007b. New data on species of *Syrphophagus* (Hymenoptera: Encyrtidae) from Transcaucasus and Turkey. *Annals of the Entomological Society of America* 100(5): 683-687.

Japoshvili G, Abrantes I. 2006. New records of Encyrtids (Hymenoptera: Chalcidoidea; Encyrtidae) from Portugal, including descriptions of two new species. *Entomological News* 117(4): 423-431.

Japoshvili G, Noyes JS. 2005. New record of Encyrtidae (Hymenoptera: Chalcidoidea). *Caucasian Entomological Bulletin* 1(2): 159-160.

Japoshvili G, Noyes JS. 2006. New records of Encyrtids (Hymenoptera: Chalcidoidea) from Europe, *Entomology Review* 81(1): 218-225.

Khalaf J, Aberoomand G. 1989. Preliminary research on the biology and biological control of mealybug in Fars Province of Iran. *Applied Entomology & Phytopathology* 56(1-2): 93-99.

Kiriukhin G. 1947. Les cochenilles farineuses et leurs parasites en Iran (sousfamille: Pseudococcinae). *Ministère de l'Agriculture, Entomologie et Phytopathologie Appliquées* 4: 1-17.

Lachinani P, Ahmadi AA. 1993. Natural enemies of Oriental yellow scale, *Aonidiella*

*orientalis* Newstead in citrus groves of Fars province. In: *Proceeding of the 11th Plant Protection Congress of Iran*, p. 203. Rasht, 28 August-2 September 1993 Rasht, University of Guilan, Iran.

Lotfalizadeh H. 2000a. Lacewings parasitoids (Neuroptera: Chrysopidae) in Shiraz. *Journal of Entomological Society of Iran* 19(1, 2): 31-44.

Lotfalizadeh H. 2000b. New record of aphidophagous syrphid flies parasitoids (Diptera: Syrphidae) from Iran. *Applied Entomology & Phytopathology* 67(1/2): 25.

Lotfalizadeh H, Ahmadi AA. 2000. Natural enemies of cypress tree mealybug, *Planococcus vovae* (Nasonov), and their parasitoids in Shiraz, Iran. *Iran Agricultural Research* 19(2), 145-154

Lotfalizadeh H, Ebrahimi E. 2001. New report of *Homalotylus nigricornis* Mercet (Hym.: Encyrtidae) in Iran, *Journal of Entomological Society of Iran* 21 (1): 116.

Maafi S, Rajabi G, Jafari ME. 1998. Introduction of the natural enemies of *Planococcus citri* in Mazandaran. In: *Proceedings of the 13th Iranian Plant Protection Congress, Karaj*, p.153. 23- 27 August 1998 Karaj, Karaj Junior College of Agriculture, Iran.

Manickavasagam S, Mehrnejad MR, Noyes JS. 2008. *Cheiloneurus pistaciae* sp. nov. (Hymenoptera: Encyrtidae) a facultative hyperparasitoid of *Kermania pistaciella* Amsel (Lepidoptera: Tineidae), a pest of pistachio trees in Iran. *Zootaxa* 1958: 61-64.

Mansouri M. 2005. *Geographical distribution and Phenology of Hymenopteran Parasitoids*

on *Lepidosaphes pistaciae* Arch. (Homoptera: Diaspididae) in Isfahan province. M. Sc. Thesis of Entomology, College of Agriculture, Isfahan University of Technology, Isfahan, Iran.

Mehrnejad MR. 2002a. Negative agents harming the population of *Psyllaephagus pistaciae*, the parasitoid of the common pistachio psylla. In: *Proceeding of the 15th Iranian Plant Protection Congress*, p. 175. Kermanshah, 7-11 September 2002 Kermanshah, Razi University of Kermanshah, Iran.

Mehrnejad MR. 2002b. Bionomics of the common pistachio psylla, *Agonoscena pistaciae*, in Iran. *Acta Horticulturae* 591: 535-539.

Mehrnejad MR. 2002c. Overwintering sites of the parasitoid, *Psyllaephagus pistaciae* and its host, *Agonoscena pistaciae*. In: *Abstracts, VIIth European Congress of Entomology*, Abstract 077. October 7-13 2002, Thessaloniki, Greece pp.66 Hellenic Entomological Society.

Mehrnejad MR. 2008. Seasonal biology and abundance of *Psyllaephagus pistaciae* (Hymenoptera: Encyrtidae), a biocontrol agent of the common pistachio psylla *Agonoscena pistaciae* (Hemiptera: Psylloidea). *Biocontrol Science and Technology* 18 (4): 409-417.

Mehrnejad MR, Copland MJW. 2006. Biological parameters of parasitoid *Psyllaephagus pistaciae* and its host *Agonoscena pistaciae* in relation to temperature. *Journal of the Entomological Research Society* 8(1): 1-20.

Mehrnejad MR, Copland MJW. 2007. Host discrimination by the endoparasitoid

*Psyllaephagus pistaciae* (Hymenoptera: Encyrtidae): a case of time-dependent ability. *Biocontrol Science & Technology* 17(3/4): 401-411.

Mehrnejad MR, Emami SY. 2005. Parasitoids associated with the common pistachio psylla, *Agonoscena pistaciae*, in Iran. *Biological Control* 32 (3): 385-390.

Moddarres Awal M. 1997 *List of Agricultural Pests and Their Natural Enemies in Iran*. Revised edition. Mashhad: Ferdowsi University Press, Iran.

Mossadegh MS, Baniamiri V. 1996. The biology of *Anagyrus dactylopii* (How.), (Hymenoptera: Encyrtidae) on *Nipaeococcus viridis* [sic] (Newstead), (Homo.: Pseudococcidae) in southwest Iran. In: *Proceedings XX International Congress of Entomology*, Abstract 20-212. Firenze, Italy, August 25-31, 1996: 666.

Myartseva SN. 1980. Two encyrtid species of the genus *Paraphaenodiscus* (Hymenoptera, Chalcidoidea) new for the Palaearctic from the southern Turkmen SSR and Iran. *Vestnik Zoologii, Kiev* 3: 82-85.

Myartseva SN, Sugonjaev ES. 1977. New Irano-Turan species of *Encyrtus* Latr. (Hymenoptera, Chalcidoidea). *Izvestiya Akademii Nauk Turkmenskoy SSR (Seriya Biologicheskikh Nauk)* (2):74-76

Noori H, Asgari S, Moslehi-Rad H. 2003. Study and identification on *Eurygaster integriceps* Put. egg parasitoids in Ghazvin Province. *Journal of Agricultural Sciences, Islamic Azad University* 9(2): 141-150.

Novin M. 2000. *The biology and population fluctuations of Nipaeococcus viridis* (News.)

and its natural enemies in citrus orchards of Dezful. M. Sc. Thesis of Entomology, Shahid Chamran University, Ahwaz, Iran.

Novin M, Mossadegh MS, Karami Nejad M, Ghasemi Nejad M. 2000. Natural enemy of *Nipaecoccus viridis* in the North of Khuzestan. In: *Proceedings of the 14th Iranian Plant Protection Congress*, p. 264. *Isfahan, 5-8 September 2000* Isfahan, Isfahan University of Technology, Iran.

Noyes JS. 2000. Encyrtidae of Costa Rica (Hymenoptera: Chalcidoidea), 1. The subfamily Tetracneminae, parasitoids of mealybugs (Homoptera: Pseudococcidae). *Memoirs of the American Entomological Institute* 62, 355 pp.

Noyes JS. 2009. *Universal Chalcidoidea Database*. Natural History Museum, London. [www.nhm.ac.uk/entomology/chalcidoids/index.html](http://www.nhm.ac.uk/entomology/chalcidoids/index.html).

Noyes JS, Fallahzadeh M. 2005. *Psyllaephagus zdeneki* sp. nov. (Hymenoptera: Encyrtidae) from Iran, a parasitoid of *Euphyllura pakistanica* (Hemiptera: Psyllidae). *Acta Societatis Zoologicae Bohemoslovenicae* 69(1-2): 204-207.

Noyes JS, Hayat M. 1994. *Oriental mealybug parasitoids of the Anagyrini (Hymenoptera: Encyrtidae)* CAB International.

Prinsloo GL. 1984. An illustrated guide to the parasitic wasps associated with citrus pests in the Republic of South Africa. *Science Bulletin, Department of Agriculture, Republic of South Africa* 402:50.

Prinsloo GL. 1996. The genus *Comperiella* Howard (Hymenoptera: Encyrtidae) in

southern Africa: parasitoids of armoured scale insects (Homoptera: Diaspididae). *African Entomology* 4(2):155.

OILB. 1971. *Liste d'identification des entomophages 8*. Organisation internationale de lutte biologique.

Omid R, Azizkhani E, Askary H, Moniri VR. 2005. Biological investigation of *Ocneria terebinthina* in Khojir Protected Area. *Iranian Journal of Forest and Range Protection Research* 2(2): 209-211.

Rakhshani E, Talebi AA, Sadeghi SE, Kavallieratos NG, Rashed A. 2004. Seasonal parasitism and hyperparasitism of walnut aphid, *Chromaphis juglandicola* (Hom.: Aphididae) in Tehran Province. *Journal of Entomological Society of Iran* 23(2): 131-143.

Rakhshani E, Talebi AA, Stary P, Manzari S, Rezwani A. 2005. Redescription and biocontrol information of *Pauesia antennata* (Mukerji) (Hym., Braconidae, Aphidiinae), parasitoid of *Pterochloroides persicae* (Chol.) (Hom., Aphidoidea, Lachnidae). *Journal of the Entomological Research Society* 7(3): 59-69.

Radjabi G. 1986. *Insects attacking rosaceous fruit Trees in Iran*. Vol. II. Publication of Plant Pest & Diseases Research Institute, Tehran, Iran.

Radjabi G. 1989. *Insects attacking rosaceous fruit Trees in Iran*. Vol. III. Publication of Plant Pest & Diseases Research Institute, Tehran.

Radjabi G, Amir-Nazari M. 1989. Egg parasites of the sunn pest in the central part of the Iranian plateau. *Entomologie et Phytopathologie Appliquées* 56(1, 2): 1-12.



Rajabi Mazhar N, Sadeghi SE. 2006. Studing biology of *Psyllopsis repens* Lo. and identification of its natural enemies in Hamadan Povince. In: *Proceedings of the 17th Iranian Plant Protection Congress*, p. 236. Karaj, 2-5 September 2006 Karaj, Campus of Agriculture and Natural Resources, University of Tehran, Iran.

Rajabi Mazhar N, Sadeghi SE. Yarmand H. 2007. Report of *Psyllaephagus clarrips* (Hym.: Encyrtidae) on *Psyllaeopsis repens* in Iran. *Iranian Journal of Forest & Range Protection Research* 1(2): 211.

Sabzevari A. 1968. Lepidopterous pest on apricot. In: *Proceedings of the first Iranian Plant Protection Congress*, p. 63-80. 13-18 September 1968 Karaj, Tehran University, Iran.

Sabahi Q, Kharrazi A, Esmaili M, Abaii M. 1998. Studies on the biology of *Ooencyrtus* cf. *masii* (Hymenoptera: Lymantriidae), an egg parasitoid of pistachio defoliator *Ocneria terebinthina* Stgr. (Lepidoptera: Lymantriidae) in Fars Province. In: *Proceedings of the 13th Iranian Plant Protection Congress*, p. 138. Karaj, 23- 27 August 1998 Karaj, Karaj Junior College of Agriculture, Iran.

Sabahi Q, Pakdel AK, Esmaili M. 1999. Study on the biology of *Ooencyrtus* cf. *masii* (Hymenoptera:Encyrtidae), a new egg parasitoid of pistachio defoliator *Ocneria terebinthina* (Lepidoptera: Lymantriidae). *Journal of Entomological Society of Iran* 18(1/2): 1-5.

Safaralizadeh MH. 1984. *Studies on biology and biological control of hymenopteroides in*

*Hamadan*.University of Bu Ali Sina, Faculty Agriculture, Hamadan, Iran.

Talebi AA, Ameri A, Fathipour Y, Rakhshani E. 2008. Natural enemies of Cypress tree mealybug, *Planococcus vovae* (Nasonov) (Hem., Pseudococcidae), and their parasitoids in Tehran, Iran, *Journal of Agricultural Science & Technology* 10(2): 123-133.

Talebi AA, Hasanpour F, Rakhshani E, Goldasteh S, Stojanovic A. 2009. Two new records of encyrtids as parasitoid of *Sphaerolecanium prunastri* (Hemiptera: Coccidae) in Iran. *Journal of Entomological Society of Iran*, 28(2): 75-78.

Trjapitzin VA. 1978. Hymenoptera II. Chalcidoidea 7. Encyrtidae. Opredeliteli Nasekomykh Evropeyskoy Chasti SSR, In: Medvedev, G.S., Editor. *Keys to the insects of the European part of the USSR. Hymenoptera II*. 3:236-328. Opredeliteli Nasekomykh Evropeyskoy Chasti SSR.

Trjapitzin VA. 1989. Parasitic Hymenoptera of the Fam. Encyrtidae of Palaearctics. *Opredeliteli po Faune SSSR. Zoologicheskim Institutom Akademii Nauk SSR, Leningrad.*

Trjapitzin VA, Myartseva SN. 2004. Species of the genus *Encyrtus* Latreille (Hymenoptera: Encyrtidae) in Mexico, Central America, *West Indies & Bermuda. Vedelia* 11:20.

Xu Z, Lotfalizadeh H. 2000. Notes on eight species of Encyrtidae (Hymenoptera: Chalcidoidea) from Iran with a description of one new species. *Entomotaxonomia* 22(1): 61-64.

Yasnosh V, Japoshvili GO. 1999. Parasitoids of the genus *Psyllaephagus* Ashmead (Hymenoptera: Chalcidoidea: Encyrtidae) in

Georgia with the description of *P. georgicus* sp. nov. *Bulletin of the Georgian Academy of Sciences* 159(3):516-519.

Yazdani A, Mehrnejad MR. 1993. The first record of one psyllid species and several Hymenoptera parasitoids on pistachio psyllid from Iran. In: *Proceeding of the 11th Plant Protection Congress of Iran*, p. 210. Rasht, 28 August-2 September 1993 Rasht, University of Guilan, Iran.

Yazdani A, Rajabi A. 1993. The first record of Hymenoptera parasitoids of scale insects on pistachio in Iran. In: *Proceeding of the 11th Plant Protection Congress of Iran*, p. 212. Rasht, 28 August-2 September 1993 Rasht, University of Guilan, Iran.

Zhang YZ, Li W. Huang DW. 2005. A taxonomic study of Chinese species of *Ooencyrtus* (Insecta: Hymenoptera: Encyrtidae). *Zoological Studies* 44(3): 358.
